# Supplementary material for: Efficient linkage mapping using exome capture and extreme QTL in schistosome parasites
Source: PubMed Central journal article supplement (PMC4117968; doi:10.1186/1471-2164-15-617), 2014-07-21

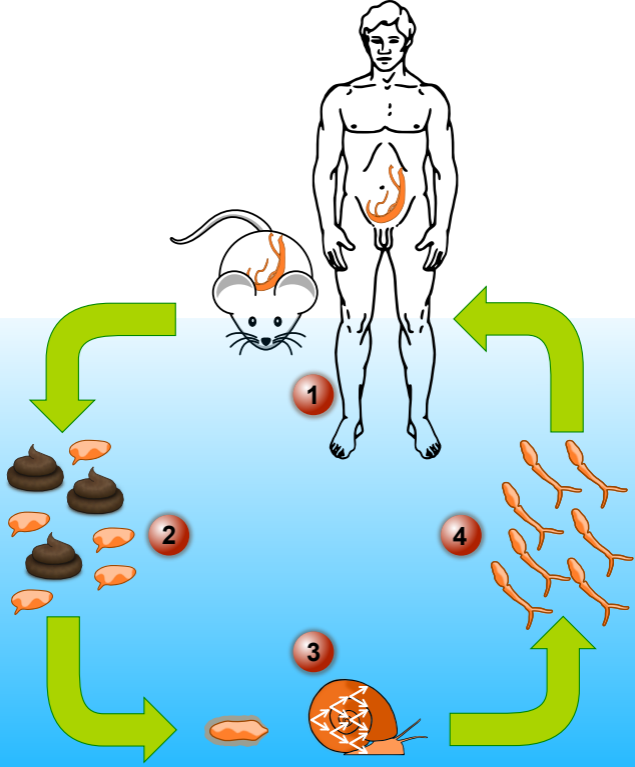

Supplement: 12864_2014_6296_MOESM1_ESM.pdf [file 12864_2014_6296_MOESM1_ESM.pdf]
