# Supplementary material for: Efficient linkage mapping using exome capture and extreme QTL in schistosome parasites
Source: PubMed Central journal article supplement (PMC4117968; doi:10.1186/1471-2164-15-617), 2014-07-21

39 snails shedding male F2 cercariae  
(one male genotype per snail = **39 genotypes**)

91 snails shedding female F2 cercariae  
(one female genotype per snail = **91 genotypes**)

10 of each male genotype per hamster  
(39 x 10 = **390 male F2 cercariae**)

4 of each female genotype per hamster  
(91 x 4 = **364 female F2 cercariae**)

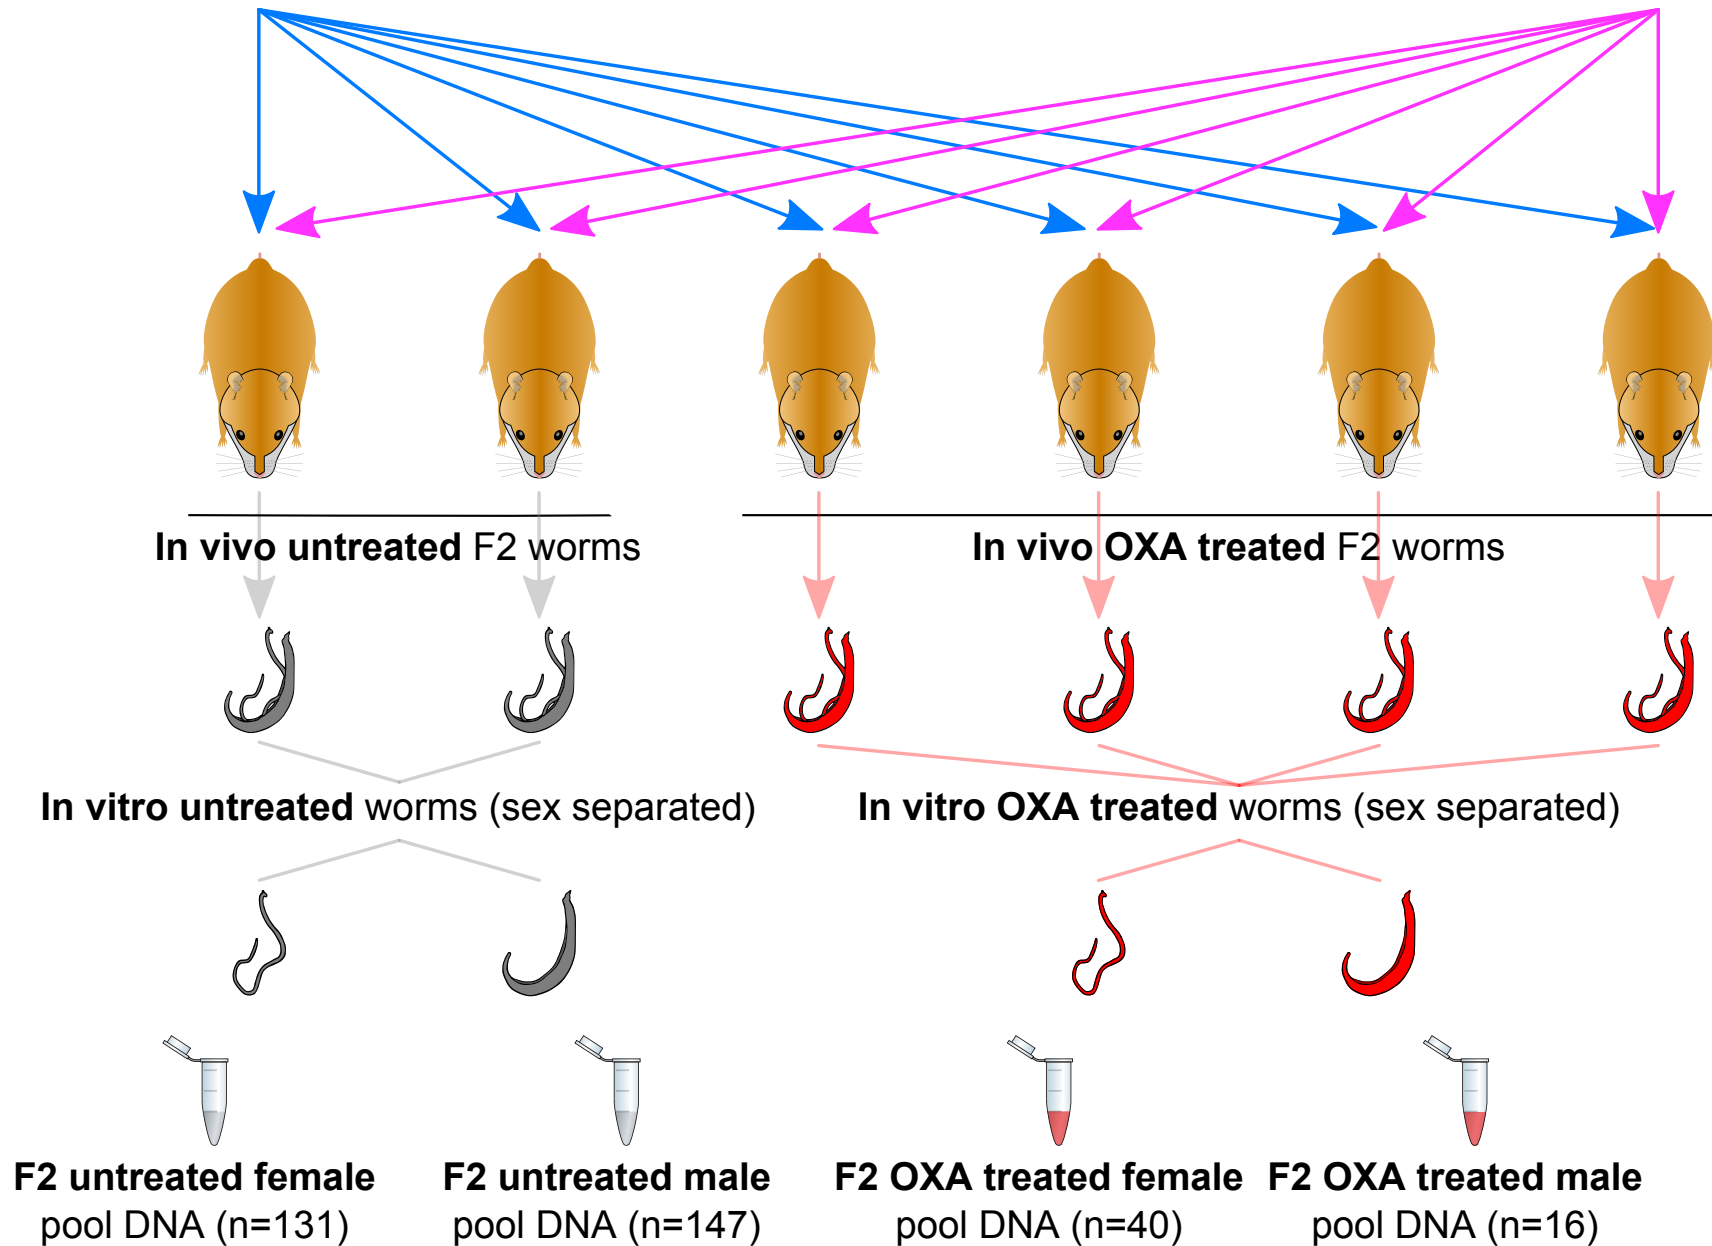

Supplement: 12864_2014_6296_MOESM2_ESM.pdf [file 12864_2014_6296_MOESM2_ESM.pdf]
